# Supplementary material for: Right Forceps Minor and Anterior Thalamic Radiation Predict Executive Function Skills in Young Bilingual Adults
Source: PubMed Central journal article supplement (PMC5811666; doi:10.3389/fpsyg.2018.00118), 2018-02-09
Supplement: Image_6.pdf [file Image_6.pdf]

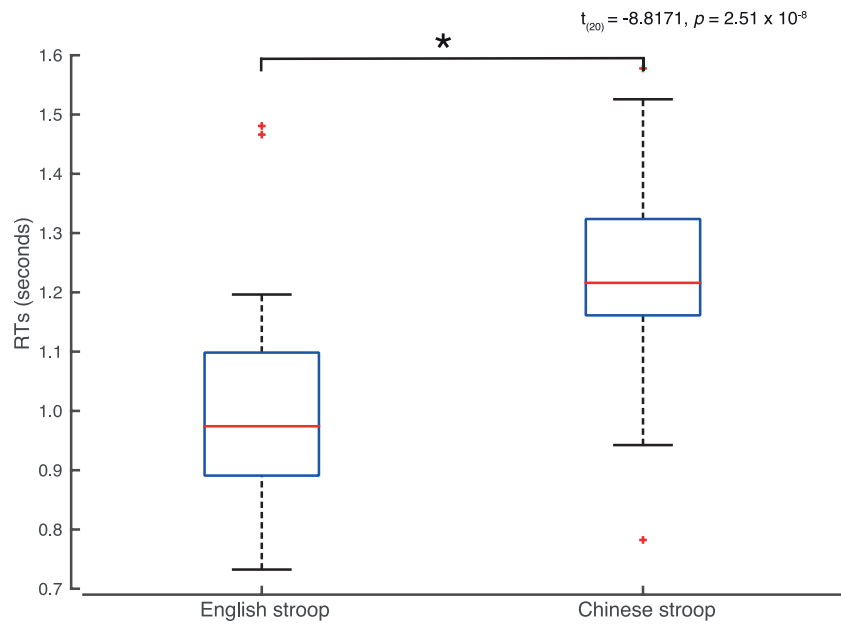

**Figure S6.** Statistical difference in students' RTs between English and Chinese Stroop.
